# Supplementary material for: Inactive X chromosome-specific histone H3 modifications and CpG hypomethylation flank a chromatin boundary between an X-inactivated and an escape gene
Source: PubMed Central journal article supplement — Nucleic Acids Res. 2009 Oct 20;37(22):7416–28. doi: 10.1093/nar/gkp860 (PMC2794193; doi:10.1093/nar/gkp860), 2009-10-20
Supplement: gkp860_1.pdf [file gkp860_1.pdf]

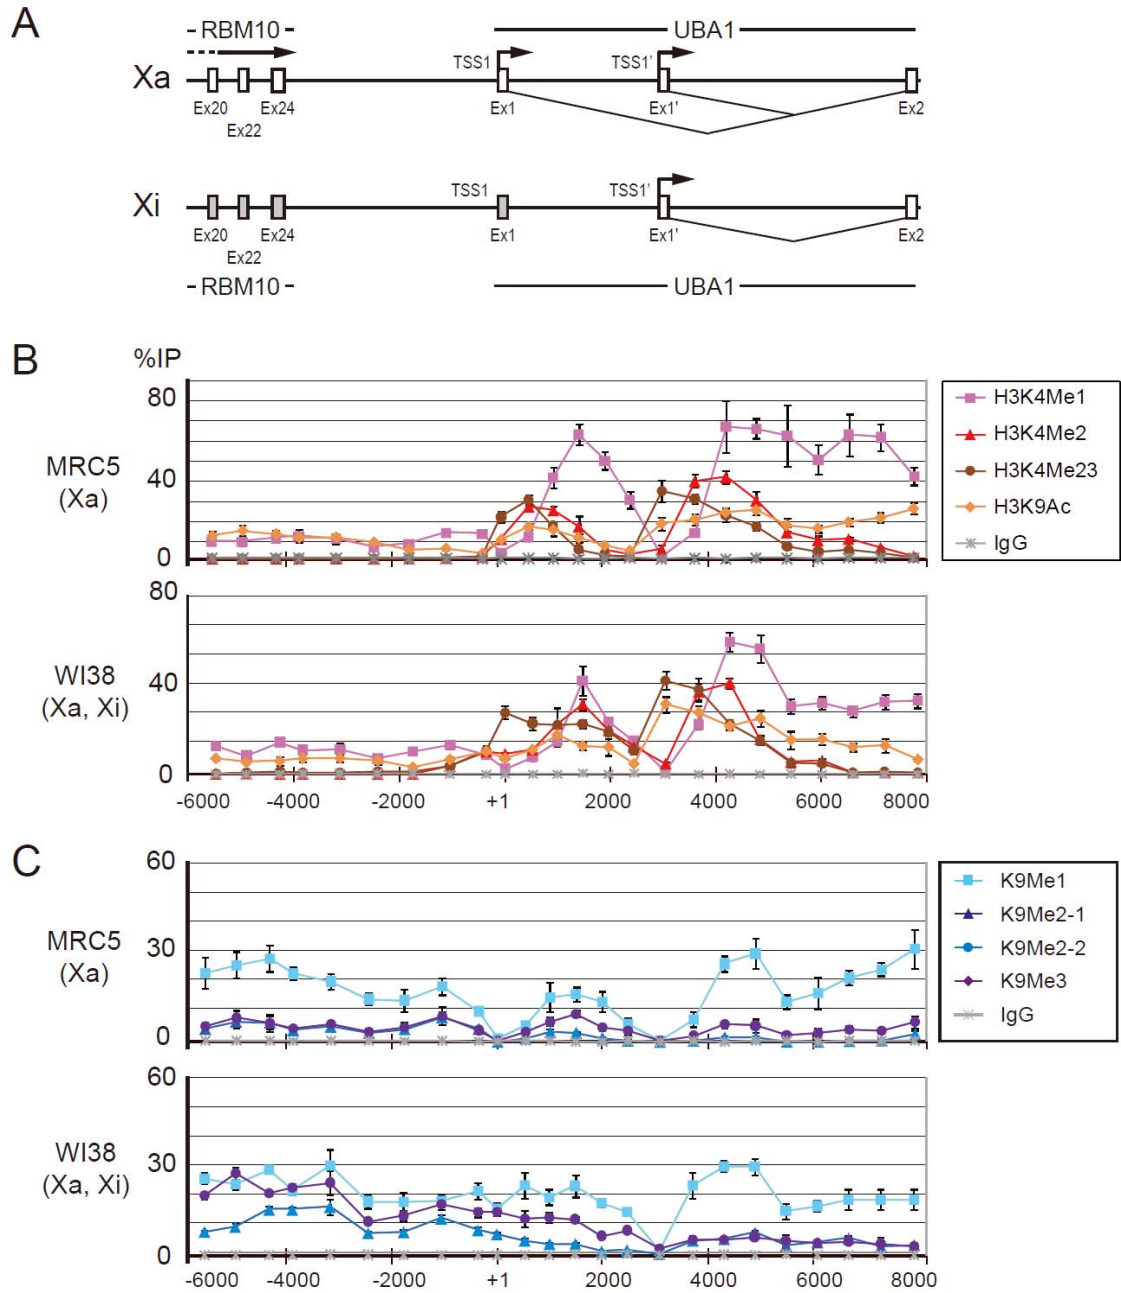

**sFig. 1. Histone modification profiles in the ~12 kb region encompassing *RBM10* exon 20 to *UBA1* exon 2 in human diploid cells.**

(A) Schematic representation of the locus on Xa and Xi. (B and C) Chromatin prepared from MRC5 (46, XY, harboring Xa; top) and WI38 (46, XX, harboring Xa and Xi; bottom) was immunoprecipitated using antibodies against different modifications of histone H3K4 and H3K9. The enrichment of each region in immunoprecipitates was evaluated using real-time PCR and expressed as the percentage to the input (% IP). The mean values of three independent ChIP experiments are plotted with the standard deviations. (B) ChIP with histone H3K4me1, me2, me2+3, and H3K9ac. (C) ChIP with histone H3K9me1, me2, and me3.
